# Supplementary material for: Identify and classify interprofessional primary care performance indicators: a scoping review protocol
Source: PubMed Central journal article supplement — BMJ Open. 2023 May 30;13(5):e072186. doi: 10.1136/bmjopen-2023-072186 (PMC10255150; doi:10.1136/bmjopen-2023-072186), 2023-05-30
Supplement: bmjopen-2023-072186.draft_revisions.pdf [file bmjopen-2023-072186.draft_revisions.pdf]

# BMJ Open

BMJ Open is committed to open peer review. As part of this commitment we make the peer review history of every article we publish publicly available.

When an article is published we post the peer reviewers' comments and the authors' responses online. We also post the versions of the paper that were used during peer review. These are the versions that the peer review comments apply to.

The versions of the paper that follow are the versions that were submitted during the peer review process. They are not the versions of record or the final published versions. They should not be cited or distributed as the published version of this manuscript.

BMJ Open is an open access journal and the full, final, typeset and author-corrected version of record of the manuscript is available on our site with no access controls, subscription charges or pay-per-view fees (<http://bmjopen.bmj.com>).

If you have any questions on BMJ Open's open peer review process please email [info.bmjopen@bmj.com](mailto:info.bmjopen@bmj.com)

# BMJ Open

## A scoping review protocol to identify and classify interprofessional primary care performance indicators

|                               |                                                                                                                                                                                                                                                                                                                                                                                                                                                                                                                                                                                                                                                                                                                                                                                                                                                                                                                                                                                                                                                                                                                                                                                                                                                                                                                                                                                                                                                                                                                                                                                                                                                                                                                                                                                                                                                                                                                                                                                                                                                                                      |
|-------------------------------|--------------------------------------------------------------------------------------------------------------------------------------------------------------------------------------------------------------------------------------------------------------------------------------------------------------------------------------------------------------------------------------------------------------------------------------------------------------------------------------------------------------------------------------------------------------------------------------------------------------------------------------------------------------------------------------------------------------------------------------------------------------------------------------------------------------------------------------------------------------------------------------------------------------------------------------------------------------------------------------------------------------------------------------------------------------------------------------------------------------------------------------------------------------------------------------------------------------------------------------------------------------------------------------------------------------------------------------------------------------------------------------------------------------------------------------------------------------------------------------------------------------------------------------------------------------------------------------------------------------------------------------------------------------------------------------------------------------------------------------------------------------------------------------------------------------------------------------------------------------------------------------------------------------------------------------------------------------------------------------------------------------------------------------------------------------------------------------|
| Journal:                      | <i>BMJ Open</i>                                                                                                                                                                                                                                                                                                                                                                                                                                                                                                                                                                                                                                                                                                                                                                                                                                                                                                                                                                                                                                                                                                                                                                                                                                                                                                                                                                                                                                                                                                                                                                                                                                                                                                                                                                                                                                                                                                                                                                                                                                                                      |
| Manuscript ID                 | bmjopen-2023-072186                                                                                                                                                                                                                                                                                                                                                                                                                                                                                                                                                                                                                                                                                                                                                                                                                                                                                                                                                                                                                                                                                                                                                                                                                                                                                                                                                                                                                                                                                                                                                                                                                                                                                                                                                                                                                                                                                                                                                                                                                                                                  |
| Article Type:                 | Protocol                                                                                                                                                                                                                                                                                                                                                                                                                                                                                                                                                                                                                                                                                                                                                                                                                                                                                                                                                                                                                                                                                                                                                                                                                                                                                                                                                                                                                                                                                                                                                                                                                                                                                                                                                                                                                                                                                                                                                                                                                                                                             |
| Date Submitted by the Author: | 03-Feb-2023                                                                                                                                                                                                                                                                                                                                                                                                                                                                                                                                                                                                                                                                                                                                                                                                                                                                                                                                                                                                                                                                                                                                                                                                                                                                                                                                                                                                                                                                                                                                                                                                                                                                                                                                                                                                                                                                                                                                                                                                                                                                          |
| Complete List of Authors:     | <p>Yapi, Sophie Marielle; University of Montreal Hospital Centre Research Centre</p> <p>Poitras, Marie-Eve; Université du Québec à Chicoutimi, Département des sciences de la santé</p> <p>Donnelly, Catherine; Queen's University Faculty of Health Sciences, Health Services and Policy Research Institute</p> <p>Ashcroft, Rachelle; University of Toronto, Factor Inwentash Faculty of Social Work</p> <p>Greiver, Michelle; North York General Hospital, Department of Family and Community Medicine; University of Toronto, Department of Family and Community Medicine</p> <p>Couturier, Yves; University of Sherbrooke, School of Social Work</p> <p>Nikiema, Jean Noël; University of Montreal, Department of Health Management, Evaluation &amp; Policy</p> <p>Breton, Mylaine; University of Sherbrooke, Department of Family Medicine and Emergency Medicine, Faculty of Medicine and Health Sciences</p> <p>Layani, Géraldine; University of Montreal, Department of Family and Emergency Medicine</p> <p>Kaczorowski, Janusz ; University of Montreal Hospital Centre Research Centre; University of Montreal, Department of Family and Emergency Medicine</p> <p>Bergman, Howard; McGill University, Department of Family Medicine</p> <p>Lussier, Marie-Thérèse; University of Montreal Hospital Centre Research Centre</p> <p>Aggarwal, Monica; University of Toronto, Dalla Lana School of Public Health</p> <p>Fernainy, Pamela; University of Montreal, Department of Health Management, Evaluation &amp; Policy; University of Montreal Hospital Centre Research Centre</p> <p>McGraw, Monica; Université du Québec à Chicoutimi, Département des sciences de la santé</p> <p>Milius, Djims; University of Montreal Hospital Centre Research Centre</p> <p>Mehta, Kavita; Association of Family Health Teams of Ontario</p> <p>Samson, Kevin; Association of Family Health Teams of Ontario</p> <p>Sourial, Nadia; University of Montreal, Department of Health Management, Evaluation &amp; Policy; University of Montreal Hospital Centre Research Centre</p> |
| Keywords:                     | Interprofessional Relations, Quality in health care < HEALTH SERVICES ADMINISTRATION & MANAGEMENT, PRIMARY CARE                                                                                                                                                                                                                                                                                                                                                                                                                                                                                                                                                                                                                                                                                                                                                                                                                                                                                                                                                                                                                                                                                                                                                                                                                                                                                                                                                                                                                                                                                                                                                                                                                                                                                                                                                                                                                                                                                                                                                                      |

1  
2  
3  
4  
5  
6  
7  
8  
9  
10  
11  
12  
13  
14  
15  
16  
17  
18  
19  
20  
21  
22  
23  
24  
25  
26  
27  
28  
29  
30  
31  
32  
33  
34  
35  
36  
37  
38  
39  
40  
41  
42  
43  
44  
45  
46  
47  
48  
49  
50  
51  
52  
53  
54  
55  
56  
57  
58  
59  
60

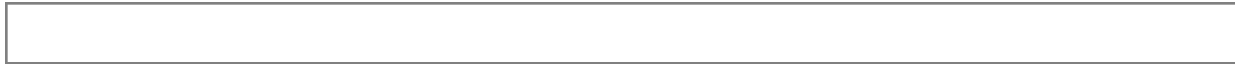

SCHOLARONE™  
Manuscripts

# A scoping review protocol to identify and classify interprofessional primary care performance indicators

## Authors:

Sopie Marielle Yapi<sup>a</sup>, Marie-Eve Poitras<sup>b</sup>, Catherine Donnelly<sup>c</sup>, Rachelle Ashcroft<sup>d</sup>, Michelle Greiver<sup>e</sup>, Yves Couturier<sup>f</sup>, Jean Noël Nikiema<sup>g</sup>, Mylaine Breton<sup>h</sup>, Géraldine Layani<sup>i</sup>, Janusz Kaczorowski<sup>a,i</sup>, Howard Bergman<sup>j</sup>, Marie-Thérèse Lussier<sup>a</sup>, Monica Aggarwal<sup>k</sup>, Pamela Fernainy<sup>a,g</sup>, Monica McGraw<sup>c</sup>, Djims Milius<sup>a</sup>, Kavita Mehta<sup>l</sup>, Kevin Samson<sup>l</sup>, Nadia Sourial<sup>a,g,\*</sup>

<sup>a</sup> Research Center of the Centre Hospitalier de l'Université de Montréal, Montreal, QC, Canada.

<sup>b</sup> Département des sciences de la santé, Université du Québec à Chicoutimi, Chicoutimi, QC, Canada.

<sup>c</sup> Health Services and Policy Research Institute, Faculty of Health Sciences, Queen's University, Kingston, ON, Canada.

<sup>d</sup> Factor Inwentash Faculty of Social Work, University of Toronto, Toronto, ON, Canada.

<sup>e</sup> Department of Family and Community Medicine, University of Toronto, Toronto, ON, Canada.

<sup>f</sup> School of Social Work, University of Sherbrooke, Sherbrooke, QC, Canada.

<sup>g</sup> Department of Health Management, Evaluation & Policy, School of Public Health, Université de Montréal, Montreal, QC, Canada.

<sup>h</sup> Department of Family Medicine and Emergency Medicine, Faculty of Medicine and Health Sciences, Université de Sherbrooke, Sherbrooke, QC, Canada.

<sup>i</sup> Department of Family and Emergency Medicine, Université de Montréal, Montreal, QC, Canada.

<sup>j</sup> Department of Family Medicine, McGill University, Montréal, QC, Canada.

<sup>k</sup> Dalla Lana School of Public Health, University of Toronto, Toronto, Ontario, Canada.

<sup>l</sup> Association of Family Health Teams of Ontario, Toronto, ON, Canada.

## \*Corresponding author:

Nadia Sourial, PhD [nadia.sourial@umontreal.ca](mailto:nadia.sourial@umontreal.ca)

Department of Health Management, Evaluation & Policy, School of Public Health, Université de Montréal, Montreal, QC, Canada.

850 Saint-Denis, Montreal, Quebec, H2X 0A9

Telephone: (514) 890-8000, ext. 17113

## KEYWORDS

Quality Indicators, Outcome and Process Assessment, Interprofessional Relations, Primary Health Care, Family Practice

**WORD COUNT:** 2045 words

## ABSTRACT

**Introduction** Measuring the performance of interprofessional primary care is needed to examine whether this model of care is achieving its desired outcomes on patient care and health system effectiveness as well as to guide quality improvement initiatives. The aim of this scoping review is to map the literature on primary care performance measurement indicators to determine the extent to which current indicators capture or could be adapted to capture processes, outputs and outcomes that reflect interprofessional practice.

**Methods and analysis** The review will be guided by the six-stage framework by Arksey and O'Malley (2005). Peer-reviewed and grey literature published in English or French between 2000 and 2022 will be searched to identify any study related to the concepts of performance indicators, frameworks, interprofessional teams and primary care. Two reviewers will independently screen all abstracts and full-text studies for inclusion. Eligible indicators will be classified according to process, output and outcome domains proposed by two validated frameworks.

**Ethics and dissemination** This review does not require ethical approval. The results will be published as an article in a peer-reviewed journal. The results will be disseminated through a peer-reviewed publication, conference presentations and presentations to stakeholders.

### Strengths and limitations of this study

- To the best of our knowledge, this will be the first scoping review to focus on identifying performance indicators that can measure the contribution of interprofessional primary care providers to processes, outputs and outcomes.
- A large cross-disciplinary stakeholder group including clinicians, managers and patient-partners will be consulted throughout the scoping review process.
- This review will inform the development and measurement of a core set of stakeholder-informed indicators to guide ongoing performance measurement and quality improvement of interprofessional primary care teams.
- While we sought to use broad search and eligibility criteria to identify relevant studies, exclusion criteria by language, date range and country may limit the assessment of other potentially relevant studies.

For peer review only

## INTRODUCTION

An interprofessional approach to primary care is considered a key tenet in achieving high-quality primary care by facilitating access to integrated, comprehensive, and continuous person-centred care.[1–3] As the population ages and the prevalence of chronic disease increases, health systems globally have shifted towards interprofessional primary care (IPC) teams.[4–6] These teams bring together interprofessional health providers with complementary expertise, including family physicians, nurse practitioners, nurses, social workers, pharmacists, physiotherapists, psychologists, kinesiologists, occupational therapists, dietitians, and others, to “enhance the integration of services and emphasize health promotion and chronic disease management.”[7]

Measuring the performance of IPC teams is needed to examine whether these new models of care are achieving their desired outcomes on patient care and health system effectiveness as well as to guide quality improvement initiatives.[8,9] In general, performance measurement aims to improve the quality of decisions made by all actors within the health system.[9] Performance measurement of IPC teams has also been cited as a key feature for high-performing IPC teams.[10]

Several primary care performance measurement frameworks have been proposed, including indicators on care processes such as the types of services provided, outputs related to quality of care such as timely access, continuity of care, comprehensiveness, coordination as well as patient and health system outcomes.[11–16] Despite the shift to IPC teams, the measurement of many of the indicators proposed within these frameworks rely on information related to physician encounters, obscuring the involvement and impact of the various members of the interprofessional team. For example, continuity of care is frequently measured through the proportion of visits made to the regular family physician in a given time period.[17] Excluding visits to and tasks performed by other interprofessional health providers within the team may distort the extent to which IPC teams are providing accessible and ongoing care to their patients and, more generally, may lead to potentially misleading evidence on performance.[7,18]

The aim of this scoping review is thus to map the literature on primary care performance measurement indicators to determine the extent to which current indicators capture or could be adapted to capture processes, outputs and outcomes that reflect interprofessional practice. This review constitutes the first step in a larger research project aimed at developing and measure a core set of stakeholder-informed indicators to guide ongoing performance measurement and quality

1  
2  
3 improvement of IPC teams. Overall, this review will provide new insight on existing indicators  
4 relevant to interprofessional primary care teams and identify gaps for future research. Ultimately,  
5 we hope the results of this review will support practice and policymakers in planning the  
6 organization, resources and quality initiative based on indicators that reflect interprofessional  
7 practice.  
8  
9  
10  
11  
12

## 13 **METHODS AND ANALYSIS**

14  
15 The protocol for this scoping review was based on the Arksey and O'Malley's (2005) framework  
16 for scoping reviews,[19] the Levac *et al.* methodological enhancement,[20] as well as the Preferred  
17 Reporting Items for Systematic Reviews and Meta-Analyses (PRISMA) extension for Scoping  
18 Reviews (PRISMA-ScR).[21] Accordingly, six stages will be undertaken: (1) identifying the  
19 research question; (2) identifying relevant studies; (3) selecting studies; (4) charting the data; (5)  
20 collating, summarizing, and reporting the results and (6) consulting with relevant stakeholders.  
21 The protocol is not registered with PROSPERO, as it currently does not accept scoping reviews.  
22  
23  
24  
25  
26  
27  
28

### 29 **Stage 1: Identifying the research question**

30  
31 The main research question for this scoping review was codesigned with our research team  
32 consisting of approximately 20 clinicians, researchers, methodologists, managers, and a patient-  
33 partner with expertise in primary care performance evaluation, interprofessional primary care  
34 teams and insight into priorities for policy making aimed at strengthening primary care.  
35 Accordingly, the scoping review is centered on the following main question:  
36  
37

38 - Which existing primary care performance measurement indicators measure or could be adapted  
39 to measure the involvement and impact of interprofessional health providers on performance?  
40

41 Based on this initial question, the following secondary questions will be examined:  
42

43 - How are indicators classified according to different domains of performance (processes, outputs,  
44 and outcomes)?  
45

46 -What data sources may be utilized to measure these indicators?  
47  
48  
49  
50

### 51 **Stage 2: Identifying relevant studies**

52  
53 Published literature will be searched using the following electronic databases: MEDLINE  
54 (PubMed), EMBASE and Cumulative Index to Nursing and Allied Health Literature (CINAHL).  
55  
56  
57  
58  
59  
60



Grey literature will also be consulted using Cochrane, Google Scholar, Google, Grey Literature Report and OpenGrey to identify reports relevant to this review. Authors of the identified articles and reports will be contacted if needed for further or missing information. We will also consult local, regional, and national organizations' online sites, published materials, and experts from our research teams for relevant studies. Additionally, the reference list of included studies will be hand-searched to identify more relevant literature.

Studies published in English or French will be included. Given that reforms proposing the creation of interprofessional primary care teams have occurred mainly in the last two decades, studies published from 2000 to 2022 will be considered.

An initial exploratory search was conducted using MEDLINE to identify search terms contained in relevant articles in order to develop a full search strategy. The search terms and strategy were validated through input from the research team and an experienced research librarian. Additional search terms and keywords were taken from known studies that report indicators to measure interprofessional or overall primary care performance. The search strategy was pilot tested and refined to compile a list of keywords from titles, abstracts, keyword heading, keyword heading word and MeSH terms used in publications most relevant to the review. It will be adapted for each database and information source. The search strategy combines four concepts including the following terms as listed in table 1.

**Table 1: MEDLINE (PubMed) search strategy**

| <b>Concepts</b>       | <b>Research equation with keywords for Abstract/Title/Keyword Heading/Keyword Heading Word and MeSH terms</b>                                                                                                                                                                                                                                                                                                                               |
|-----------------------|---------------------------------------------------------------------------------------------------------------------------------------------------------------------------------------------------------------------------------------------------------------------------------------------------------------------------------------------------------------------------------------------------------------------------------------------|
| Performance Indicator | (((Indicator* or outcome* or measur* or reporting or parameter* or norm* or criteria or standard* or scale*) adj3 (performance or quality)) or QI or PQI).ab,kf,kw,ti.<br>OR (Quality Indicators, Health Care/ or "Quality of Health Care"/ or Quality Improvement/ or Quality Control/ or Medical Audit/ or Guideline Adherence/ or Benchmarking/ or Clinical Audit/ or Standard of Care/ or Outcome and Process Assessment, Health Care/) |
| Framework             | (Framework* or conceptual* model*).ab,kf,kw,ti.<br>OR (Models, Theoretical/ or Concept Formation/)                                                                                                                                                                                                                                                                                                                                          |

|                         |                                                                                                                                                                                                                                                                                                                                                                                                                                       |
|-------------------------|---------------------------------------------------------------------------------------------------------------------------------------------------------------------------------------------------------------------------------------------------------------------------------------------------------------------------------------------------------------------------------------------------------------------------------------|
| Interprofessional Teams | (Interprofessional or interdisciplinary or cross-disciplinary or multidisciplinary or multiprofessional or cooperation or teamwork or team-based).ab,kf,kw,ti.<br>OR (Cooperative Behavior/ or Interprofessional Relations/ Interdisciplinary Communication/)                                                                                                                                                                         |
| Primary Care            | (Family practice or medical practice or general practice or family medicine or primary care or primary health care or health care delivery or patient-centered medical home or gp or gps or primary care practitioner or (family adj (physician* or doctor*))).ab,kf,kw,ti.<br>OR (Primary Health Care/ or Family Practice/ or "Delivery of Health Care, Integrated"/ or Group Practice/ or Health Personnel/ or Physicians, Family/) |

### Stage 3: Study selection

Following the search, the results will be recorded into Endnote™, a bibliographic reference management software to remove duplicates and facilitate referencing. The results will then be exported to Covidence for screening and data collection.[22] The screening and selection of eligible studies will involve a first screening of title and abstract followed by a full-text review of those studies selected at the first screening stage. Studies meeting the following inclusion and exclusion criteria, as described in table 2, will be considered.

Table 2: Inclusion and exclusion criteria

|                 | <b>Inclusion criteria</b>                                                                                                                                | <b>Exclusion criteria</b>                                                                                                                                                                                   |
|-----------------|----------------------------------------------------------------------------------------------------------------------------------------------------------|-------------------------------------------------------------------------------------------------------------------------------------------------------------------------------------------------------------|
| Focus           | Indicators measuring the contribution of interprofessional primary care teams on performance including processes, outputs (quality of care) and outcomes | Frameworks outside primary care<br>Theoretical frameworks without operational indicators<br>Indicators specific to a disease (cancer, pain-management) or subpopulation (veterans, diabetic, palliative...) |
| Type of studies | Reviews, framework development studies, commentaries, qualitative                                                                                        | Experimental or quasi-experimental studies (focus on evaluation of an intervention or program),                                                                                                             |

|         |                                                                                                                                                                              |                                                     |
|---------|------------------------------------------------------------------------------------------------------------------------------------------------------------------------------|-----------------------------------------------------|
|         | studies, observational studies, cross-sectional studies                                                                                                                      | Study protocols, conference proceedings, editorials |
| Context | The eleven high-income countries of the Commonwealth Fund: Australia, Canada, England, France, Germany, Netherlands, New Zealand, Norway, Sweden, Switzerland, United States | Other countries                                     |

Country selection was informed by the Commonwealth Fund's international health policy surveys.[23] We considered these countries in order to select studies covering healthcare systems comparable to the Canadian system.[24]

Two members of our team will review all studies against the inclusion/exclusion criteria. Studies will be sorted as included, excluded or uncertain. Any discrepancies in their independent assessment will be resolved through discussion, consensus, and consultation with the lead member of the research team. The scoping review will report the reasons for excluding studies at full-text review. Inter-rater reliability will be assessed on a sample of studies at both screening stages to calibrate and refine the process. Suppose agreement between the reviewers is inferior to 75% at any of these stages. In that case, reasons for disagreement will be explored, eligibility criteria will be clarified, and testing will be repeated until the inter-rater reliability is adequate. Before beginning the abstract review, the inclusion and exclusion criteria will also be tested on a sample of study abstracts produced by the keyword database searches. This will verify that our selection criteria are robust and specific enough to capture relevant studies.

#### **Stage 4: Data collection**

Study characteristics to be extracted include but are not limited to source details, healthcare context and results extracted. A full list of characteristics is provided in Table 3. Data collection will be conducted by two reviewers independently extracting data from all included studies, and disagreement will be discussed among the research team. To ensure the accuracy of the process, the form will be tested on a sample of studies and revised if needed. The scoping review manuscript will acknowledge any modifications to the following form.

Table 3: Data collection form

| Characteristics    | Details                                                                            |
|--------------------|------------------------------------------------------------------------------------|
| Source details     | Authors                                                                            |
|                    | Year                                                                               |
|                    | Document type (published or grey literature)                                       |
|                    | Country                                                                            |
|                    | Purpose                                                                            |
|                    | Methods                                                                            |
|                    | Results                                                                            |
| Healthcare context | Setting                                                                            |
|                    | Model of care (including funding, governance, and team composition), if applicable |
|                    | Geographical region, if applicable                                                 |
| Results extracted  | Description of framework and/or indicators                                         |
|                    | Total number of indicators extracted                                               |

### Stage 5: Data summary and synthesis of results

A table synthesising the indicators identified in the review will be classified based on relevant domains from two frameworks: the primary care measurement framework proposed by the World Health Organization and the Quintuple Aim framework proposed by the Institute for Health Improvement. The WHO framework classifies indicators according to service delivery processes (e.g. selection and planning of services, community linkages) and outputs (e.g.: access, comprehensiveness, continuity, coordination, efficiency, equity...) as well as health system outcomes to monitor PHC performance.[15] Outcomes will be further classified according the Quintuple Aim proposes five key outcomes (population health, patient experience, cost reduction, care team well-being, and health equity) of a high performing health system.[16] . The data source (e.g.: administrative data, electronic medical records, survey...) proposed for each indicator will also be extracted. The final format of the table will depend on the gathered data.

The meaning and implication of the findings captured in this scoping review will be reported considering the stated objectives in consultation with the research team. The PRISMA-ScR instrument for reporting scoping review results will be used to guide the publication of results.[21]

### **Stage 6: Stakeholder consultation**

During the development of the scoping review, there will be regular consultations with the research team. The consultations will be held mainly through videoconference. The purpose of the first consultation will be to collect feedback on the scoping review protocol regarding the search strategy and to refine our research question. It is also an occasion to gather additional sources of information about potential studies to include in the review. The next consultation will allow us to inform and validate preliminary findings from stage five of the scoping review and discuss the dissemination strategy. A final consultation will take place to inform the synthesis of the results and their implications.

### **PATIENT AND PUBLIC INVOLVEMENT:**

A patient-partner is included in our team and participated in commenting the protocol. She will participate in team meetings and consulted at various stages of the review to inform the interpretation of results and knowledge dissemination strategy.

### **DISSEMINATION AND ETHICS:**

This review does not require ethics approval, since it involves reviewing and collecting data from published and/or publicly available articles. This study is expected to be completed by June 2023. The dissemination strategy includes a peer-review publication of the scoping review results, as well as presentations at primary care conferences and to key stakeholders.

### **ACKNOWLEDGMENTS**

We would like to thank Ms. Faten Hassaan, patient-partner in our team, for her time in reviewing and providing helpful feedback on the protocol.

## FOOTNOTES

Sopie Marielle Yapi<sup>a</sup>, Marie-Eve Poitras<sup>b</sup>, Catherine Donnelly<sup>c</sup>, Rachelle Ashcroft<sup>d</sup>, Michelle Greiver<sup>e</sup>, Yves Couturier<sup>f</sup>, Jean Noël Nikiema<sup>g</sup>, Mylaine Breton<sup>h</sup>, Géraldine Layani<sup>i</sup>, Janusz Kaczorowski<sup>a,i</sup>, Howard Bergman<sup>j</sup>, Marie-Thérèse Lussier<sup>a</sup>, Monica Aggarwal<sup>k</sup>, Pamela Fernainy<sup>a,g</sup>, Monica McGraw<sup>c</sup>, Djims Milius<sup>a</sup>, Kavita Mehta<sup>l</sup>, Kevin Samson<sup>l</sup>, Nadia Sourial<sup>a,g,\*</sup>

**Contributorship statement:** NS conceived of the idea, developed the research question and study methods and contributed meaningfully to the drafting and editing; SMY aided significantly in developing the study methods and contributed meaningfully to the drafting, editing and formatting of the manuscript; MEP contributed to conceiving the idea and aided in developing the research question and study methods, contributed meaningfully to the editing of the manuscript. CD, RA, MG, YC, JNN, MB, GL, HB, MTL, MA, KM, KS, DM and JK aided in developing the research question and study methods, contributed meaningfully to the editing of the manuscript. PF and MM contributed to developing the methods. All authors approved the final manuscript.

**Competing interests:** No competing interests to declare.

**Funding:** This research received no specific grant from any funding agency in the public, commercial or not-for-profit sectors.

**Provenance and peer review:** Not commissioned; externally peer reviewed.

**Data sharing statement:** No data are available.

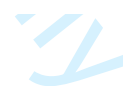

**REFERENCES:**

- [1] Aggarwal M, Hutchison B. Toward a Primary Care Strategy for Canada Canadian Foundation for Healthcare Improvement. 2012. <https://doi.org/10.13140/RG.2.2.13854.05442>.
- [2] Mulvale G, Embrett M, Razavi SD. “Gearing Up” to improve interprofessional collaboration in primary care: a systematic review and conceptual framework. *BMC Fam Pract* 2016;17:83. <https://doi.org/10.1186/s12875-016-0492-1>.
- [3] Bodenheimer T, Wagner EH, Grumbach K. Improving primary care for patients with chronic illness. *JAMA* 2002;288:1775–9. <https://doi.org/10.1001/jama.288.14.1775>.
- [4] Schottenfeld L, Petersen D, Peikes D, Ricciardi R, Burak H, McNellis R, Genevro J. Creating Patient-centered Team-based Primary Care. *Rockv MD Agency Healthc Res Qual* 2016;27.
- [5] Hutchison B, Levesque J-F, Strumpf E, Coyle N. Primary Health Care in Canada: Systems in Motion. *Milbank Q* 2011;89:256–88. <https://doi.org/10.1111/j.1468-0009.2011.00628.x>.
- [6] Wagner EH, Flinter M, Hsu C, Crompton D, Austin BT, Etz R, et al. Effective team-based primary care: observations from innovative practices. *BMC Fam Pract* 2017;18:13. <https://doi.org/10.1186/s12875-017-0590-8>.
- [7] Donnelly C, Ashcroft R, Mofina A, Bobbette N, Mulder C. Measuring the performance of interprofessional primary health care teams: understanding the teams perspective. *Prim Health Care Res Dev* 2019;20:e125. <https://doi.org/10.1017/S1463423619000409>.
- [8] Zaadoud B, Chbab Y. The Performance Measurement Frameworks in Health Care: Appropriateness Criteria for Measuring and Evaluating the Quality-of-Care Performance through a Systematic Review. *Manag Issues Healthc Syst* 2021;7:11–34. <https://doi.org/10.33844/mihs.2021.60603>.
- [9] WHO Regional Office for Europe, Policies EO on HS and, Smith PC, Mossialos E, Papanicolas I. Performance measurement for health system improvement: experiences, challenges and prospects: background document 2. World Health Organization. Regional Office for Europe; 2008.
- [10] Aggarwal M. Interprofessional Primary Care Teams: A literature review of potential international best practices 2022.

- 1  
2  
3 [11] Performance Measurement: Accelerating Improvement (Pathways to Quality Health Care  
4 Series). Washington, D.C.: National Academies Press; 2006. <https://doi.org/10.17226/11517>.  
5  
6  
7 [12] Veillard J, Tipper B, Allin S. Health system performance reporting in Canada: Bridging  
8 theory and practice at pan-Canadian level. *Can Public Adm* 2015;58:15–38.  
9 <https://doi.org/10.1111/capa.12106>.  
10  
11  
12 [13] Downing A, Rudge G, Cheng Y, Tu Y-K, Keen J, Gilthorpe MS. Do the UK government's  
13 new Quality and Outcomes Framework (QOF) scores adequately measure primary care  
14 performance? A cross-sectional survey of routine healthcare data. *BMC Health Serv Res*  
15 2007;7:166.  
16  
17  
18 [14] Turner M, D'Silva J, Tipper B, Krylova O, Webster G. Assessing primary healthcare using  
19 pan- Canadian indicators of health and health system performance. *Heal Q* 2013;16:9–12.  
20  
21  
22 [15] Geneva: World Health Organization and the United Nations Children's Fund (UNICEF).  
23 Primary health care measurement framework and indicators: monitoring health systems  
24 through a primary health care lens 2022. [https://www.who.int/publications-detail-](https://www.who.int/publications-detail-redirect/9789240044210)  
25 [redirect/9789240044210](https://www.who.int/publications-detail-redirect/9789240044210) (accessed November 14, 2022).  
26  
27  
28 [16] Nundy S, Cooper LA, Mate KS. The Quintuple Aim for Health Care Improvement: A New  
29 Imperative to Advance Health Equity. *JAMA* 2022;327:521–2.  
30 <https://doi.org/10.1001/jama.2021.25181>.  
31  
32  
33 [17] Pollack AH, Backonja U, Miller AD, Mishra SR, Khelifi M, Kendall L, et al. Closing the  
34 Gap: Supporting Patients' Transition to Self-Management after Hospitalization. *Proc*  
35 *SIGCHI Conf Hum Factors Comput Syst CHI Conf* 2016;2016:5324–36.  
36 <https://doi.org/10.1145/2858036.2858240>.  
37  
38  
39 [18] Ashcroft R. Inadequate performance measures affecting practices, organizations and  
40 outcomes of Ontario's family health teams. *Healthc Policy Polit Sante* 2014;10:86–96.  
41  
42  
43 [19] Arksey H, O'Malley L. Scoping studies: towards a methodological framework. *Int J Soc Res*  
44 *Methodol* 2005;8:19–32. <https://doi.org/10.1080/1364557032000119616>.  
45  
46  
47 [20] Levac D, Colquhoun H, O'Brien KK. Scoping studies: advancing the methodology.  
48 *Implement Sci* 2010;5:69. <https://doi.org/10.1186/1748-5908-5-69>.  
49  
50  
51  
52  
53  
54  
55  
56  
57  
58  
59



- 1  
2  
3 [21] Tricco AC, Lillie E, Zarin W, O'Brien KK, Colquhoun H, Levac D, et al. PRISMA Extension  
4 for Scoping Reviews (PRISMA-ScR): Checklist and Explanation. *Ann Intern Med*  
5 2018;169:467–73. <https://doi.org/10.7326/M18-0850>.  
6  
7  
8  
9 [22] Veritas Health Innovation, Melbourne, Australia. Covidence systematic review software.  
10 Available at [www.covidence.org](http://www.covidence.org).  
11  
12  
13 [23] Michelle M. Doty, Roosa Tikkanen, Arnav Shah, and Eric C. Schneider,. Primary Care  
14 Physicians' Role in Coordinating Medical and Health-Related Social Needs in Eleven  
15 Countries. *Health Aff (Millwood)* 2019:27.  
16  
17  
18 [24] Langton JM, Wong ST, Johnston S, Abelson J, Ammi M, Burge F, et al. Primary Care  
19 Performance Measurement and Reporting at a Regional Level: Could a Matrix Approach  
20 Provide Actionable Information for Policy Makers and Clinicians? *Healthc Policy Polit Sante*  
21 2016;12:33–51.  
22  
23  
24  
25  
26  
27  
28  
29  
30  
31  
32  
33  
34  
35  
36  
37  
38  
39  
40  
41  
42  
43  
44  
45  
46  
47  
48  
49  
50  
51  
52  
53  
54  
55  
56  
57  
58  
59  
60

# BMJ Open

## A scoping review protocol to identify and classify interprofessional primary care performance indicators

|                                 |                                                                                                                                                                                                                                                                                                                                                                                                                                                                                                                                                                                                                                                                                                                                                                                                                                                                                                                                                                                                                                                                                                                                                                                                                                                                                                                                                                                                                                                                                                                                                                                                                                                                                                                                                                                                                                                                                                                                                                                                                                                                                      |
|---------------------------------|--------------------------------------------------------------------------------------------------------------------------------------------------------------------------------------------------------------------------------------------------------------------------------------------------------------------------------------------------------------------------------------------------------------------------------------------------------------------------------------------------------------------------------------------------------------------------------------------------------------------------------------------------------------------------------------------------------------------------------------------------------------------------------------------------------------------------------------------------------------------------------------------------------------------------------------------------------------------------------------------------------------------------------------------------------------------------------------------------------------------------------------------------------------------------------------------------------------------------------------------------------------------------------------------------------------------------------------------------------------------------------------------------------------------------------------------------------------------------------------------------------------------------------------------------------------------------------------------------------------------------------------------------------------------------------------------------------------------------------------------------------------------------------------------------------------------------------------------------------------------------------------------------------------------------------------------------------------------------------------------------------------------------------------------------------------------------------------|
| Journal:                        | <i>BMJ Open</i>                                                                                                                                                                                                                                                                                                                                                                                                                                                                                                                                                                                                                                                                                                                                                                                                                                                                                                                                                                                                                                                                                                                                                                                                                                                                                                                                                                                                                                                                                                                                                                                                                                                                                                                                                                                                                                                                                                                                                                                                                                                                      |
| Manuscript ID                   | bmjopen-2023-072186.R1                                                                                                                                                                                                                                                                                                                                                                                                                                                                                                                                                                                                                                                                                                                                                                                                                                                                                                                                                                                                                                                                                                                                                                                                                                                                                                                                                                                                                                                                                                                                                                                                                                                                                                                                                                                                                                                                                                                                                                                                                                                               |
| Article Type:                   | Protocol                                                                                                                                                                                                                                                                                                                                                                                                                                                                                                                                                                                                                                                                                                                                                                                                                                                                                                                                                                                                                                                                                                                                                                                                                                                                                                                                                                                                                                                                                                                                                                                                                                                                                                                                                                                                                                                                                                                                                                                                                                                                             |
| Date Submitted by the Author:   | 22-Apr-2023                                                                                                                                                                                                                                                                                                                                                                                                                                                                                                                                                                                                                                                                                                                                                                                                                                                                                                                                                                                                                                                                                                                                                                                                                                                                                                                                                                                                                                                                                                                                                                                                                                                                                                                                                                                                                                                                                                                                                                                                                                                                          |
| Complete List of Authors:       | <p>Yapi, Sophie Marielle; University of Montreal Hospital Centre Research Centre</p> <p>Poitras, Marie-Eve; Université du Québec à Chicoutimi, Département des sciences de la santé</p> <p>Donnelly, Catherine; Queen's University Faculty of Health Sciences, Health Services and Policy Research Institute</p> <p>Ashcroft, Rachelle; University of Toronto, Factor Inwentash Faculty of Social Work</p> <p>Greiver, Michelle; North York General Hospital, Department of Family and Community Medicine; University of Toronto, Department of Family and Community Medicine</p> <p>Couturier, Yves; University of Sherbrooke, School of Social Work</p> <p>Nikiema, Jean Noël; University of Montreal, Department of Health Management, Evaluation &amp; Policy</p> <p>Breton, Mylaine; University of Sherbrooke, Department of Family Medicine and Emergency Medicine, Faculty of Medicine and Health Sciences</p> <p>Layani, Géraldine; University of Montreal, Department of Family and Emergency Medicine</p> <p>Kaczorowski, Janusz ; University of Montreal Hospital Centre Research Centre; University of Montreal, Department of Family and Emergency Medicine</p> <p>Bergman, Howard; McGill University, Department of Family Medicine</p> <p>Lussier, Marie-Thérèse; University of Montreal Hospital Centre Research Centre</p> <p>Aggarwal, Monica; University of Toronto, Dalla Lana School of Public Health</p> <p>Fernainy, Pamela; University of Montreal, Department of Health Management, Evaluation &amp; Policy; University of Montreal Hospital Centre Research Centre</p> <p>McGraw, Monica; Université du Québec à Chicoutimi, Département des sciences de la santé</p> <p>Milius, Djims; University of Montreal Hospital Centre Research Centre</p> <p>Mehta, Kavita; Association of Family Health Teams of Ontario</p> <p>Samson, Kevin; Association of Family Health Teams of Ontario</p> <p>Sourial, Nadia; University of Montreal, Department of Health Management, Evaluation &amp; Policy; University of Montreal Hospital Centre Research Centre</p> |
| <b>Primary Subject Heading</b>: | General practice / Family practice                                                                                                                                                                                                                                                                                                                                                                                                                                                                                                                                                                                                                                                                                                                                                                                                                                                                                                                                                                                                                                                                                                                                                                                                                                                                                                                                                                                                                                                                                                                                                                                                                                                                                                                                                                                                                                                                                                                                                                                                                                                   |

1  
2  
3  
4  
5  
6  
7  
8  
9  
10  
11  
12  
13  
14  
15  
16  
17  
18  
19  
20  
21  
22  
23  
24  
25  
26  
27  
28  
29  
30  
31  
32  
33  
34  
35  
36  
37  
38  
39  
40  
41  
42  
43  
44  
45  
46  
47  
48  
49  
50  
51  
52  
53  
54  
55  
56  
57  
58  
59  
60

|                            |                                                                                                                 |
|----------------------------|-----------------------------------------------------------------------------------------------------------------|
| Secondary Subject Heading: | Health services research                                                                                        |
| Keywords:                  | Interprofessional Relations, Quality in health care < HEALTH SERVICES ADMINISTRATION & MANAGEMENT, PRIMARY CARE |
|                            |                                                                                                                 |

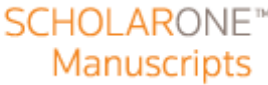

# A scoping review protocol to identify and classify interprofessional primary care performance indicators

## Authors:

Sopie Marielle Yapi<sup>a</sup>, Marie-Eve Poitras<sup>b</sup>, Catherine Donnelly<sup>c</sup>, Rachelle Ashcroft<sup>d</sup>, Michelle Greiver<sup>e</sup>, Yves Couturier<sup>f</sup>, Jean Noël Nikiema<sup>g</sup>, Mylaine Breton<sup>h</sup>, Géraldine Layani<sup>i</sup>, Janusz Kaczorowski<sup>a,i</sup>, Howard Bergman<sup>j</sup>, Marie-Thérèse Lussier<sup>a</sup>, Monica Aggarwal<sup>k</sup>, Pamela Fernainy<sup>a,g</sup>, Monica McGraw<sup>c</sup>, Djims Milius<sup>a</sup>, Kavita Mehta<sup>l</sup>, Kevin Samson<sup>l</sup>, Nadia Sourial<sup>a,g,\*</sup>

<sup>a</sup> Research Center of the Centre Hospitalier de l'Université de Montréal, Montreal, QC, Canada.

<sup>b</sup> Département des sciences de la santé, Université du Québec à Chicoutimi, Chicoutimi, QC, Canada.

<sup>c</sup> Health Services and Policy Research Institute, Faculty of Health Sciences, Queen's University, Kingston, ON, Canada.

<sup>d</sup> Factor Inwentash Faculty of Social Work, University of Toronto, Toronto, ON, Canada.

<sup>e</sup> Department of Family and Community Medicine, University of Toronto, Toronto, ON, Canada.

<sup>f</sup> School of Social Work, University of Sherbrooke, Sherbrooke, QC, Canada.

<sup>g</sup> Department of Health Management, Evaluation & Policy, School of Public Health, Université de Montréal, Montreal, QC, Canada.

<sup>h</sup> Department of Family Medicine and Emergency Medicine, Faculty of Medicine and Health Sciences, Université de Sherbrooke, Sherbrooke, QC, Canada.

<sup>i</sup> Department of Family and Emergency Medicine, Université de Montréal, Montreal, QC, Canada.

<sup>j</sup> Department of Family Medicine, McGill University, Montréal, QC, Canada.

<sup>k</sup> Dalla Lana School of Public Health, University of Toronto, Toronto, Ontario, Canada.

<sup>l</sup> Association of Family Health Teams of Ontario, Toronto, ON, Canada.

## \*Corresponding author:

Nadia Sourial, PhD [nadia.sourial@umontreal.ca](mailto:nadia.sourial@umontreal.ca)

Department of Health Management, Evaluation & Policy, School of Public Health, Université de Montréal, Montreal, QC, Canada.

850 Saint-Denis, Montreal, Quebec, H2X 0A9

Telephone: (514) 890-8000, ext. 17113

## KEYWORDS

Quality Indicators, Outcome and Process Assessment, Interprofessional Relations, Primary Health Care, Family Practice

**WORD COUNT:** 2080 words

## ABSTRACT

**Introduction** Measuring the performance of interprofessional primary care is needed to examine whether this model of care is achieving its desired outcomes on patient care and health system effectiveness as well as to guide quality improvement initiatives. The aim of this scoping review is to map the literature on primary care performance measurement indicators to determine the extent to which current indicators capture or could be adapted to capture processes, outputs and outcomes that reflect interprofessional primary care.

**Methods and analysis** The review will be guided by the six-stage framework by Arksey and O'Malley (2005). MEDLINE, Embase, CINAHL, grey literature and the reference list of key studies will be searched to identify any study, published in English or French between 2000 and 2022, related to the concepts of performance indicators, frameworks, interprofessional teams and primary care. Two reviewers will independently screen all abstracts and full-text studies for inclusion. Eligible indicators will be classified according to process, output and outcome domains proposed by two validated frameworks. This study started in November 2022 and is expected to be completed by July 2023.

**Ethics and dissemination** This review does not require ethical approval. The results will be published as an article in a peer-reviewed journal. The results will be disseminated through a peer-reviewed publication, conference presentations and presentations to stakeholders.

### Strengths and limitations of this study

- To the best of our knowledge, this will be the first scoping review to focus on identifying performance indicators that can measure the contribution of interprofessional primary care providers to processes, outputs and outcomes.
- A large cross-disciplinary stakeholder group including clinicians, managers and patient-partners will be consulted throughout the scoping review process.
- The study followed established and systematic methods for conducting scoping reviews.
- While we sought to use broad search and eligibility criteria to identify relevant studies, exclusion criteria by language, date range and country may limit the assessment of other potentially relevant studies. Furthermore, we limited the results to studies using conceptual frameworks to identify indicators. Complementary studies have been added to the review through backward citation research and consultation with experts in primary care.
- There will be no formal assessment of included studies quality or quality of the indicators identified.

iew only

## INTRODUCTION

Primary care constitutes the first point of contact between a patient and the health care system to provide services including prevention, diagnosis, treatment, health promotion, and counselling.[1,2] An interprofessional approach to primary care is considered a key tenet in achieving high-quality primary care by facilitating access to integrated, comprehensive, and continuous person-centred care.[3–5] As the population ages and the prevalence of chronic disease increases, health systems globally have shifted towards interprofessional primary care (IPC) teams.[6–8] These teams bring together interprofessional health providers with complementary expertise, including family physicians, nurse practitioners, nurses, social workers, pharmacists, physiotherapists, psychologists, kinesiologists, occupational therapists, dietitians, and others, to “enhance the integration of services and emphasize health promotion and chronic disease management.”[9]

Measuring the performance of IPC teams is needed to examine whether these new models of care are achieving their desired outcomes on patient care and health system effectiveness as well as to guide quality improvement initiatives.[10,11] In general, performance measurement aims to improve the quality of decisions made by all actors within the health system.[11] Performance measurement of IPC teams has also been cited as a key feature for high-performing IPC teams.[12] Several primary care performance measurement frameworks have been proposed, including indicators on care processes such as the types of services provided, outputs related to quality of care such as timely access, continuity of care, comprehensiveness, coordination as well as patient and health system outcomes.[13–18] Despite the shift to IPC teams, the measurement of many of the indicators proposed within these frameworks rely on information related to physician encounters, obscuring the involvement and impact of the various members of the interprofessional team. For example, continuity of care is frequently measured through the proportion of visits made to the regular family physician in a given time period.[19] Excluding visits to and tasks performed by other interprofessional health providers within the team may distort the extent to which IPC teams are providing accessible and ongoing care to their patients and, more generally, may lead to potentially misleading evidence on performance.[9,20] To our knowledge, there is currently no knowledge synthesis on performance indicators that can measure the contribution of interprofessional primary care providers, across multiple diseases or care settings. However, the need to develop such indicators is growing. [9]

1  
2  
3 The aim of this scoping review is thus to map the literature on primary care performance  
4 measurement indicators to determine the extent to which current indicators capture or could be  
5 adapted to capture processes, outputs and outcomes that reflect interprofessional primary care.  
6  
7 This review constitutes the first step in a larger research project aimed at developing and measuring  
8 a core set of stakeholder-informed indicators to guide ongoing performance measurement and  
9 quality improvement of IPC teams. Overall, this review will provide new insight on existing  
10 indicators relevant to interprofessional primary care teams and identify gaps for future research.  
11  
12 Ultimately, we hope the results of this review will support practice and policymakers in planning  
13 the organization, resources and quality initiative based on indicators that reflect interprofessional  
14 primary care.  
15  
16  
17  
18  
19  
20  
21

## 22 **METHODS AND ANALYSIS**

23  
24 The protocol for this scoping review was based on the Arksey and O'Malley's (2005) framework  
25 for scoping reviews,[21] the Levac *et al.* methodological enhancement,[22] as well as the Preferred  
26 Reporting Items for Systematic Reviews and Meta-Analyses (PRISMA) extension for Scoping  
27 Reviews (PRISMA-ScR).[23] Accordingly, six stages will be undertaken: (1) identifying the  
28 research question; (2) identifying relevant studies; (3) selecting studies; (4) charting the data; (5)  
29 collating, summarizing, and reporting the results and (6) consulting with relevant stakeholders.  
30  
31 The protocol is not registered with PROSPERO, as it currently does not accept scoping reviews.  
32  
33 The review started in November 2022 and is expected to take approximately 8 months to be  
34 completed. As of March 2023, two electronic databases (MEDLINE and EMBASE) have been  
35 searched.  
36  
37  
38  
39  
40  
41  
42

### 43 **Stage 1: Identifying the research question**

44  
45 The main research question for this scoping review was codesigned with our research team  
46 consisting of approximately 20 clinicians, researchers, methodologists, managers, and a patient-  
47 partner. The members of the team have expertise in primary care performance evaluation,  
48 interprofessional primary care teams and primary care policy. Accordingly, the scoping review is  
49 centered on the following main question:  
50  
51

52 - Which existing primary care performance measurement indicators measure or could be adapted  
53 to measure the involvement and impact of interprofessional health providers on performance?  
54  
55  
56  
57  
58  
59  
60



1  
2  
3 Based on this initial question, the following secondary questions will be examined:  
4

5 - How are indicators classified according to different domains of performance (processes, outputs,  
6 and outcomes)?  
7

8 -What data sources may be utilized to measure these indicators?  
9

## 10 11 **Stage 2: Identifying relevant studies**

12  
13 Published literature will be searched using the following electronic databases: MEDLINE  
14 (PubMed), EMBASE and Cumulative Index to Nursing and Allied Health Literature (CINAHL).  
15 Grey literature will also be consulted using Cochrane, Google Scholar, Google, Grey Literature  
16 Report and OpenGrey to identify reports relevant to this review. Authors of the identified articles  
17 and reports will be contacted if needed for further or missing information. We will also consult  
18 local, regional, and national organizations' online sites, published materials, and experts from our  
19 research teams for relevant studies. Additionally, the reference list of included studies will be  
20 hand-searched to identify more relevant literature.  
21

22  
23 Studies published in English or French will be included. Given that reforms proposing the creation  
24 of interprofessional primary care teams have occurred mainly in the last two decades, studies  
25 published from 2000 to 2022 will be considered.  
26

27  
28 An initial exploratory search was conducted using MEDLINE to identify search terms contained  
29 in relevant articles in order to develop a full search strategy. The search terms and strategy were  
30 validated through input from the research team and an experienced research librarian. Additional  
31 search terms and keywords were taken from known studies that report indicators to measure  
32 interprofessional or overall primary care performance. The search strategy was pilot tested and  
33 refined to compile a list of keywords from titles, abstracts, keyword heading, keyword heading  
34 word and MeSH terms used in publications most relevant to the review. It combines terms from  
35 four concepts: performance indicator, framework, interprofessional team and primary care. The  
36 draft search strategy is shown in online supplemental Appendix A. It will be further adapted for  
37 each database and information source.  
38  
39  
40  
41  
42  
43  
44  
45  
46  
47  
48  
49

## 50 51 **Stage 3: Study selection**

52  
53 Following the search, the results will be recorded into Endnote™, a bibliographic reference  
54 management software to remove duplicates and facilitate referencing. The results will then be  
55  
56  
57  
58  
59  
60

exported to Covidence for screening and data collection.[24] The screening and selection of eligible studies will involve a first screening of title and abstract followed by a full-text review of those studies selected at the first screening stage. Studies meeting the following inclusion and exclusion criteria, as described in table 1, will be considered.

**Table 1: Inclusion and exclusion criteria**

|                 | <b>Inclusion criteria</b>                                                                                                                                                    | <b>Exclusion criteria</b>                                                                                                                                                                                      |
|-----------------|------------------------------------------------------------------------------------------------------------------------------------------------------------------------------|----------------------------------------------------------------------------------------------------------------------------------------------------------------------------------------------------------------|
| Focus           | Indicators measuring the contribution of interprofessional primary care teams on performance including processes, outputs (quality of care) and outcomes                     | Frameworks outside primary care<br>Theoretical frameworks without operational indicators<br>Indicators specific to a disease (cancer, pain-management...) or subpopulation (veterans, diabetic, palliative...) |
| Type of studies | Reviews, framework development studies, commentaries, qualitative studies, observational studies, cross-sectional studies                                                    | Experimental or quasi-experimental studies (focus on evaluation of an intervention or program)<br>Study protocols, conference proceedings, editorials                                                          |
| Context         | The eleven high-income countries of the Commonwealth Fund: Australia, Canada, England, France, Germany, Netherlands, New Zealand, Norway, Sweden, Switzerland, United States | Other countries                                                                                                                                                                                                |
| Setting         | Primary care clinic in the community                                                                                                                                         | Palliative and end-of-life care<br>Paediatric care<br>Long-term care homes                                                                                                                                     |

Country selection was informed by the Commonwealth Fund's international health policy surveys.[25] We considered these countries in order to select studies covering healthcare systems comparable to the Canadian system.[26] We limited the setting to primary care delivered in the

community for the general adult population and therefore excluded studies related to paediatric, palliative and end-of-life care.

Two members of our team will review all studies against the inclusion/exclusion criteria. Studies will be sorted as included, excluded or uncertain. Any discrepancies in their independent assessment will be resolved through discussion, consensus, and consultation with the lead member of the research team. [27] The scoping review will report the reasons for excluding studies at full-text review. Inter-rater reliability will be assessed on a sample of studies at both screening stages to calibrate and refine the process. Suppose agreement between the reviewers is inferior to 75% at any of these stages. In that case, reasons for disagreement will be explored, eligibility criteria will be clarified, and testing will be repeated until the inter-rater reliability is adequate.[27] Before beginning the abstract review, the inclusion and exclusion criteria will also be tested on a sample of study abstracts produced by the keyword database searches. This will verify that our selection criteria are robust and specific enough to capture relevant studies.

#### Stage 4: Data collection

Study characteristics to be extracted include but are not limited to source details, healthcare context and results extracted. A full list of characteristics is provided in Table 2. Data collection will be conducted by two reviewers independently extracting data from all included studies, and disagreement will be discussed among the research team. To ensure the accuracy of the process, the form will be tested on a sample of studies and revised if needed. The scoping review manuscript will acknowledge any modifications to the following form.

Table 2: Data collection form

| Characteristics | Details                                      |
|-----------------|----------------------------------------------|
| Source details  | Authors                                      |
|                 | Year                                         |
|                 | Document type (published or grey literature) |
|                 | Country                                      |
|                 | Purpose                                      |
|                 | Methods                                      |

|                    |                                                                                    |
|--------------------|------------------------------------------------------------------------------------|
| Healthcare context | Model of care (including funding, governance, and team composition), if applicable |
|                    | Geographical region, if applicable                                                 |
| Results extracted  | Framework, if applicable                                                           |
|                    | Domains of performance, if applicable                                              |
|                    | Indicators                                                                         |
|                    | Description of indicators                                                          |
|                    | Data source                                                                        |
|                    | Total number of indicators extracted                                               |

### Stage 5: Data summary and synthesis of results

A table synthesising the indicators identified in the review will be classified based on relevant domains from two frameworks: the primary care measurement framework proposed by the World Health Organization and the Quintuple Aim framework proposed by the Institute for Health Improvement. If indicators are not explicitly classified into related domains of performance in the studies, they will be deductively categorized into domains from those frameworks with input from the research team. The WHO framework classifies indicators according to service delivery processes (e.g. selection and planning of services, community linkages) and outputs (e.g. access, comprehensiveness, continuity, coordination, efficiency, equity) as well as health system outcomes to monitor PHC performance.[17] Outcomes will be further classified according to the Quintuple Aim five key outcomes (population health, patient experience, cost reduction, care team well-being, and health equity) of a high performing health system.[18] The data source (e.g. administrative data, electronic medical records, survey) proposed for each indicator will also be extracted. The final format of the table will depend on the gathered data.

The meaning and implication of the findings captured in this scoping review will be reported considering the stated objectives in consultation with the research team. The PRISMA-ScR instrument for reporting scoping review results will be used to guide the publication of results.[23]

### Stage 6: Stakeholder consultation

During the development of the scoping review, there will be regular consultations with the research team. The consultations will be held mainly through videoconference. The purpose of the first

1  
2  
3 consultation will be to collect feedback on the scoping review protocol regarding the search  
4 strategy and to refine our research question. It is also an occasion to gather additional sources of  
5 information about potential studies to include in the review. The next consultation will allow us to  
6 inform and validate preliminary findings from stage five of the scoping review and discuss the  
7 dissemination strategy. A final consultation will take place to inform the synthesis of the results  
8 and their implications.  
9  
10  
11  
12  
13  
14  
15

### 16 **PATIENT AND PUBLIC INVOLVEMENT:**

17 A patient-partner is included in our team and participated in commenting the protocol. She will  
18 participate in team meetings and consulted at various stages of the review to inform the  
19 interpretation of results and knowledge dissemination strategy.  
20  
21  
22  
23  
24

### 25 **DISSEMINATION AND ETHICS:**

26 This review does not require ethics approval, since it involves reviewing and collecting data from  
27 published and/or publicly available articles. This study is expected to be completed by June 2023.  
28 The dissemination strategy includes a peer-review publication of the scoping review results, as  
29 well as presentations at primary care conferences and to key stakeholders.  
30  
31  
32  
33

34 The results of the review will inform the development and measurement of a core set of  
35 stakeholder-informed indicators to guide ongoing performance measurement and quality  
36 improvement of interprofessional primary care teams. It will also help stimulate a discussion  
37 around which actions of the interdisciplinary team could positively and negatively impact the  
38 results of these indicators.  
39  
40  
41  
42  
43  
44

### 45 **ACKNOWLEDGMENTS**

46 We would like to thank Ms. Faten Hassaan, patient-partner in our team, for her time in reviewing  
47 and providing helpful feedback on the protocol.  
48  
49  
50  
51  
52  
53  
54  
55  
56  
57  
58  
59  
60

## FOOTNOTES

Sopie Marielle Yapi<sup>a</sup>, Marie-Eve Poitras<sup>b</sup>, Catherine Donnelly<sup>c</sup>, Rachelle Ashcroft<sup>d</sup>, Michelle Greiver<sup>e</sup>, Yves Couturier<sup>f</sup>, Jean Noël Nikiema<sup>g</sup>, Mylaine Breton<sup>h</sup>, Géraldine Layani<sup>i</sup>, Janusz Kaczorowski<sup>a,i</sup>, Howard Bergman<sup>j</sup>, Marie-Thérèse Lussier<sup>a</sup>, Monica Aggarwal<sup>k</sup>, Pamela Fernainy<sup>a,g</sup>, Monica McGraw<sup>c</sup>, Djims Milius<sup>a</sup>, Kavita Mehta<sup>l</sup>, Kevin Samson<sup>l</sup>, Nadia Sourial<sup>a,g,\*</sup>

**Contributorship statement:** NS conceived of the idea, developed the research question and study methods and contributed meaningfully to the drafting and editing; SMY aided significantly in developing the study methods and contributed meaningfully to the drafting, editing and formatting of the manuscript; MEP contributed to conceiving the idea and aided in developing the research question and study methods, contributed meaningfully to the editing of the manuscript. CD, RA, MG, YC, JNN, MB, GL, HB, MTL, MA, KM, KS, DM and JK aided in developing the research question and study methods, contributed meaningfully to the editing of the manuscript. PF and MM contributed to developing the methods. All authors approved the final manuscript.

**Competing interests:** No competing interests to declare.

**Funding:** This research received no specific grant from any funding agency in the public, commercial or not-for-profit sectors.

**Provenance and peer review:** Not commissioned; externally peer reviewed.

**Data sharing statement:** No data are available.



**REFERENCES:**

- [1] Starfield B, Shi L, Macinko J. Contribution of primary care to health systems and health. *The Milbank Quarterly* 2005;83:457–502. <https://doi.org/10.1111/j.1468-0009.2005.00409.x>.
- [2] Muldoon LK, Hogg WE, Levitt M. Primary care (PC) and primary health care (PHC). What is the difference? *Canadian Journal of Public Health = Revue Canadienne De Sante Publique* 2006;97:409–11. <https://doi.org/10.1007/BF03405354>.
- [3] Aggarwal M, Hutchison B. *Toward a Primary Care Strategy for Canada* Canadian Foundation for Healthcare Improvement. 2012. <https://doi.org/10.13140/RG.2.2.13854.05442>.
- [4] Mulvale G, Embrett M, Razavi SD. “Gearing Up” to improve interprofessional collaboration in primary care: a systematic review and conceptual framework. *BMC Family Practice* 2016;17:83. <https://doi.org/10.1186/s12875-016-0492-1>.
- [5] Bodenheimer T, Wagner EH, Grumbach K. Improving primary care for patients with chronic illness. *JAMA* 2002;288:1775–9. <https://doi.org/10.1001/jama.288.14.1775>.
- [6] Schottenfeld L, Petersen D, Peikes D, et al. *Creating Patient-centered Team-based Primary Care*. Rockville, MD: Agency for Healthcare Research and Quality 2016:27.
- [7] Hutchison B, Levesque J-F, Strumpf E, et al. *Primary Health Care in Canada: Systems in Motion*. *The Milbank Quarterly* 2011;89:256–88. <https://doi.org/10.1111/j.1468-0009.2011.00628.x>.
- [8] Wagner EH, Flinter M, Hsu C, et al. Effective team-based primary care: observations from innovative practices. *BMC Family Practice* 2017;18:13. <https://doi.org/10.1186/s12875-017-0590-8>.
- [9] Donnelly C, Ashcroft R, Mofina A, et al. Measuring the performance of interprofessional primary health care teams: understanding the teams perspective. *Primary Health Care Research & Development* 2019;20:e125. <https://doi.org/10.1017/S1463423619000409>.
- [10] Zaadoud B, Chbab Y. The Performance Measurement Frameworks in Health Care: Appropriateness Criteria for Measuring and Evaluating the Quality-of-Care Performance through a Systematic Review. *Management Issues in Healthcare System* 2021;7:11–34. <https://doi.org/10.33844/mihs.2021.60603>.
- [11] Smith PC, Mossialos E, Papanicolas I. Performance measurement for health system improvement: experiences, challenges and prospects: background document 2. *World*

- 1  
2  
3 Health Organization. Regional Office for Europe, European Observatory on Health Systems  
4 and Policies; 2008.  
5  
6  
7 [12] Aggarwal M. Interprofessional Primary Care Teams: A literature review of potential  
8 international best practices. College of Family Physicians of Canada 2022.  
9  
10 [13] Institute of Medicine. Performance Measurement: Accelerating Improvement. Washington,  
11 D.C.: National Academies Press; 2006. <https://doi.org/10.17226/11517>.  
12  
13 [14] Veillard J, Tipper B, Allin S. Health system performance reporting in Canada: Bridging  
14 theory and practice at pan-Canadian level. *Canadian Public Administration* 2015;58:15–38.  
15 <https://doi.org/10.1111/capa.12106>.  
16  
17 [15] Downing A, Rudge G, Cheng Y, et al. Do the UK government’s new Quality and Outcomes  
18 Framework (QOF) scores adequately measure primary care performance? A cross-sectional  
19 survey of routine healthcare data. *BMC health services research* 2007;7:166.  
20 <https://doi.org/10.1186/1472-6963-7-166>  
21  
22 [16] Terner M, D’Silva J, Tipper B, et al. Assessing primary healthcare using pan- Canadian  
23 indicators of health and health system performance. *Healthcare Quarterly* 2013;16:9–12.  
24  
25 [17] World Health Organization and the United Nations Children’s Fund (UNICEF). Primary  
26 health care measurement framework and indicators: monitoring health systems through a  
27 primary health care lens; 2022. [https://www.who.int/publications-detail-](https://www.who.int/publications-detail-redirect/9789240044210)  
28 [redirect/9789240044210](https://www.who.int/publications-detail-redirect/9789240044210) (accessed November 14, 2022).  
29  
30 [18] Nundy S, Cooper LA, Mate KS. The Quintuple Aim for Health Care Improvement: A New  
31 Imperative to Advance Health Equity. *JAMA* 2022;327:521–2.  
32 <https://doi.org/10.1001/jama.2021.25181>.  
33  
34 [19] Pollack AH, Backonja U, Miller AD, et al. Closing the Gap: Supporting Patients’ Transition  
35 to Self-Management after Hospitalization. Proceedings of the SIGCHI conference on  
36 human factors in computing systems. *CHI Conference* 2016;2016:5324–36.  
37 <https://doi.org/10.1145/2858036.2858240>.  
38  
39 [20] Ashcroft R. Inadequate performance measures affecting practices, organizations and  
40 outcomes of Ontario’s family health teams. *Healthcare Policy = Politiques De Sante*  
41 2014;10:86–96.  
42  
43  
44  
45  
46  
47  
48  
49  
50  
51  
52  
53  
54  
55  
56  
57  
58  
59  
60



- 1  
2  
3 [21] Arksey H, O'Malley L. Scoping studies: towards a methodological framework.  
4 International Journal of Social Research Methodology 2005;8:19–32.  
5  
6 <https://doi.org/10.1080/1364557032000119616>.  
7  
8 [22] Levac D, Colquhoun H, O'Brien KK. Scoping studies: advancing the methodology.  
9 Implementation Science : IS 2010;5:69. <https://doi.org/10.1186/1748-5908-5-69>.  
10  
11 [23] Tricco AC, Lillie E, Zarin W, et al. PRISMA Extension for Scoping Reviews (PRISMA-  
12 ScR): Checklist and Explanation. Annals of Internal Medicine 2018;169:467–73.  
13  
14 <https://doi.org/10.7326/M18-0850>.  
15  
16 [24] Veritas Health Innovation, Melbourne, Australia. Covidence systematic review software.  
17 Available at [www.covidence.org](http://www.covidence.org).  
18  
19 [25] Michelle M. Doty, Roosa Tikkanen, Arnav Shah, et al. Primary Care Physicians' Role in  
20 Coordinating Medical and Health-Related Social Needs in Eleven Countries. Health Affairs  
21 (Millwood) 2019:27.  
22  
23 [26] Langton JM, Wong ST, Johnston S, et al. Primary Care Performance Measurement and  
24 Reporting at a Regional Level: Could a Matrix Approach Provide Actionable Information  
25 for Policy Makers and Clinicians? Healthcare Policy = Politiques De Sante 2016;12:33–51.  
26  
27 [27] Higgins JP, Deeks JJ. Selecting Studies and Collecting Data. Cochrane Handbook for  
28 Systematic Reviews of Interventions, John Wiley & Sons, Ltd; 2008, p. 151–85.  
29  
30 <https://doi.org/10.1002/9780470712184.ch7>.  
31  
32  
33  
34  
35  
36  
37  
38  
39  
40  
41  
42  
43  
44  
45  
46  
47  
48  
49  
50  
51  
52  
53  
54  
55  
56  
57  
58  
59  
60

## **Appendix 1** Proposed search strategies

| <b>Concepts</b>                | <b>Search terms</b>                                                                                                                                                                                                                                                                                                                                                                                                         |
|--------------------------------|-----------------------------------------------------------------------------------------------------------------------------------------------------------------------------------------------------------------------------------------------------------------------------------------------------------------------------------------------------------------------------------------------------------------------------|
| Performance<br><br>Indicator   | (((Indicator* or outcome* or measur* or reporting or parameter* or norm* or criteria or standard* or scale*) adj3 (performance or quality)) or QI or PQI) or (Quality Indicators, Health Care/ or "Quality of Health Care"/ or Quality Improvement/ or Quality Control/ or Medical Audit/ or Guideline Adherence/ or Benchmarking/ or Clinical Audit/ or Standard of Care/ or Outcome and Process Assessment, Health Care/) |
| Framework                      | (Framework* or conceptual* model*) or (Models, Theoretical/ or Concept Formation/)                                                                                                                                                                                                                                                                                                                                          |
| Interprofessional<br><br>Teams | (Interprofessional or interdisciplinary or cross-disciplinary or multidisciplinary or multiprofessional or cooperation or teamwork or team-based) or (Cooperative Behavior/ or Interprofessional Relations/ Interdisciplinary Communication/)                                                                                                                                                                               |
| Primary<br><br>Care            | (Family practice or medical practice or general practice or family medicine or primary care or primary health care or health care delivery or patient-centered medical home or gp or gps or primary care practitioner or (family adj (physician* or doctor*)) or (Primary Health Care/ or Family Practice/ or "Delivery of Health Care, Integrated"/ or Group Practice/ or Health Personnel/ or Physicians, Family/)        |

**MEDLINE**

1. (((Indicator\* or outcome\* or measur\* or reporting or parameter\* or norm\* or criteria or standard\* or scale\*) adj3 (performance or quality)) or QI or PQI).ab,kf,kw,ti.
2. (Quality Indicators, Health Care/ or "Quality of Health Care"/ or Quality Improvement/ or Quality Control/ or Medical Audit/ or Guideline Adherence/ or Benchmarking/ or Clinical Audit/ or Standard of Care/ or Outcome and Process Assessment, Health Care/)
3. 1 or 2
4. (Framework\* or conceptual\* model\*).ab,kf,kw,ti.
5. (Models, Theoretical/ or Concept Formation/)
6. 4 or 5
7. (Interprofessional or interdisciplinary or cross-disciplinary or multidisciplinary or multiprofessional or cooperation or teamwork or team-based).ab,kf,kw,ti.
8. (Cooperative Behavior/ or Interprofessional Relations/ Interdisciplinary Communication/)
9. 7 or 8
10. (Family practice or medical practice or general practice or family medicine or primary care or primary health care or health care delivery or patient-centered medical home or gp or gps or primary care practitioner or (family adj (physician\* or doctor\*))).ab,kf,kw,ti.
11. (Primary Health Care/ or Family Practice/ or "Delivery of Health Care, Integrated"/ or Group Practice/ or Health Personnel/ or Physicians, Family/)
12. 10 or 11
13. 3 and 6 and 9 and 12
14. limit 13 to ((english or french) and yr="2000 -Current")

**EMBASE**

1. (((indicator\* or outcome\* or measur\* or reporting or parameter\* or norm\* or criteria or standard\* or scale\* or metric\*) adj3 (performan\* or quality)) or QI or PQI or KPI).ab,kf,kw,ti.
2. health care quality/ or benchmarking/ or clinical effectiveness/ or clinical indicator/ or patient safety indicator/ or performance measurement system/ or quality control/ or clinical audit/ or outcome assessment/
3. 1 or 2
4. (Framework\* or conceptual\* model\*).ab,kf,kw,ti.
5. conceptual framework/ or theoretical model/
6. 4 or 5
7. (interprofession\* or inter profession\* or interdisciplin\* or inter disciplin\* or crossprofession\* or cross profession\* or crossdisciplin\* or cross disciplin\* or multiprofession\* or multi profession\* or multidisciplin\* or multi disciplin\* or transprofession\* or trans profession\* or transdisciplin\* or trans disciplin\* or cooperat\* or teamwork or team work or team based).ab,kf,kw,ti.
8. cooperation/ or teamwork/ or interdisciplinary communication/ or multidisciplinary team/ or collaborative care team/
9. 7 or 8
10. (family practi\* or medical practi\* or general practi\* or family medic\* or primary care or primary health care or patient-centered medical home\* or gp or gps or family physician\* or family doctor\*).ab,kf,kw,ti.
11. primary health care/ or primary medical care/ or group practice/ or general practice/ or health care personnel/
12. 10 or 11
13. 3 and 6 and 9 and 12
14. limit 13 to ((english or french) and yr="2000 -Current")

## CINAHL (EBSCO)

Opérateurs de restriction - Date de publication: 20000101-20231231

Opérateurs d'expansion - Appliquer des sujets équivalents

Recherche détaillée par Language: - french

Recherche détaillée par Language: - english

Modes de recherche - Booléen/Phrase

1. TI ( (((indicator\* OR outcome\* OR measur\* OR reporting OR parameter\* OR norm\* OR criteria OR standard\* OR scale\* OR metric\*) N3 (performance OR quality)) or QI or PQI or KPI) ) OR AB ( (((indicator\* OR outcome\* OR measur\* OR reporting OR parameter\* OR norm\* OR criteria OR standard\* OR scale\* OR metric\*) N3 (performance OR quality)) or QI or PQI or KPI) ) OR MW ( (((indicator\* OR outcome\* OR measur\* OR reporting OR parameter\* OR norm\* OR criteria OR standard\* OR scale\* OR metric\*) N3 (performance OR quality)) or QI or PQI or KPI) )
2. (MH "Process Assessment (Health Care)") OR (MH "Guideline Adherence") OR (MH "Quality of Health Care") OR (MH "Quality Assessment") OR (MH "Clinical Indicators") OR (MH "Benchmarking") OR (MH "Quality Improvement") OR (MH "Patient-Reported Outcomes") OR (MH "Outcomes (Health Care)")
3. 1 or 2
4. TI ( Framework\* OR conceptual\* model\* ) OR AB ( Framework\* OR conceptual\* model\* ) OR MW ( Framework\* OR conceptual\* model\* )
5. (MH "Models, Theoretical") OR (MH "Conceptual Framework")
6. 4 or 5
7. TI ( (interprofession\* OR inter profession\* OR interdisciplin\* OR inter disciplin\* OR crossprofession\* OR cross profession\* OR crossdisciplin\* OR cross disciplin\* OR multiprofession\* OR multi profession\* OR multidisciplin\* OR multi disciplin\* OR transprofession\* OR trans profession\* OR transdisciplin\* OR trans disciplin\* OR cooperat\* OR teamwork OR team work OR team based) ) OR AB ( (interprofession\* OR inter profession\* OR interdisciplin\* OR inter disciplin\* OR crossprofession\* OR cross profession\* OR crossdisciplin\* OR cross disciplin\* OR multiprofession\* OR multi profession\* OR multidisciplin\* OR multi disciplin\* OR transprofession\* OR trans profession\* OR transdisciplin\* OR trans disciplin\* OR cooperat\* OR teamwork OR team work OR team based) ) OR MW ( (interprofession\* OR inter profession\* OR interdisciplin\* OR inter disciplin\* OR crossprofession\* OR cross profession\* OR crossdisciplin\* OR cross disciplin\* OR multiprofession\* OR multi profession\* OR multidisciplin\* OR multi disciplin\* OR transprofession\* OR trans profession\* OR transdisciplin\* OR trans disciplin\* OR cooperat\* OR teamwork OR team work OR team based) )
8. (MH "Teamwork") OR (MH "Multidisciplinary Care Team") OR (MH "Interprofessional Relations")
9. 7 or 8
10. TI ( (family practi\* OR medical practi\* OR general practi\* OR family medic\* OR primary care OR primary health care OR patient-centered medical home\* OR gp OR gps OR family physician\* OR family doctor) ) OR AB ( (family practi\* OR medical practi\* OR general practi\* OR family medic\* OR primary care OR primary health care OR patient-centered medical home\* OR gp OR gps OR family physician\* OR family doctor) ) OR MW ( (family practi\* OR medical practi\* OR general practi\* OR family medic\* OR primary care OR primary health care OR patient-centered medical home\* OR gp OR gps OR family physician\* OR family doctor) )

1  
2  
3 11. (MH "Primary Health Care") OR (MH "Family Practice") OR (MH "Patient Centered Care") OR (MH  
4 "Health Personnel") OR (MH "Physicians, Family")  
5

6 12. 10 or 11  
7

8 13. 3 and 6 and 9 and 12  
9  
10  
11  
12  
13  
14  
15  
16  
17  
18  
19  
20  
21  
22  
23  
24  
25  
26  
27  
28  
29  
30  
31  
32  
33  
34  
35  
36  
37  
38  
39  
40  
41  
42  
43  
44  
45  
46  
47  
48  
49  
50  
51  
52  
53  
54  
55  
56  
57  
58  
59  
60

For peer review only
